# Supplementary material for: Improving Photoelectrochemical Properties of Anodic WO3 Layers by Optimizing Electrosynthesis Conditions
Source: Molecules. 2020 Jun 25;25(12):2916. doi: 10.3390/molecules25122916 (PMC7357059; doi:10.3390/molecules25122916)
Supplement: Supplementary file 1 [file molecules-25-02916-s001.pdf]

**Improving photoelectrochemical properties of anodic WO<sub>3</sub> layers by optimizing  
electrosynthesis conditions**

Marta Zych, Karolina Syrek\*, Leszek Zaraska, Grzegorz D. Sulka\*

*Jagiellonian University, Faculty of Chemistry, Department of Physical Chemistry and  
Electrochemistry, Gronostajowa 2, 30-387 Krakow, Poland*

\* Corresponding author. E-mail: syrek@chemia.uj.edu.pl (K.S.), sulka@chemia.uj.edu.pl  
(G.D.S)

Jagiellonian University, Faculty of Chemistry, Department of Physical Chemistry &  
Electrochemistry

Gronostajowa 2, 30387 Krakow, Poland

Tel: +48 12 686 27 70

Fax: +48 12 686 27 50

**Keywords:** anodic tungsten oxides; anodization; nanostructured morphology;  
photoelectrochemical properties

## 1. EDS spectra

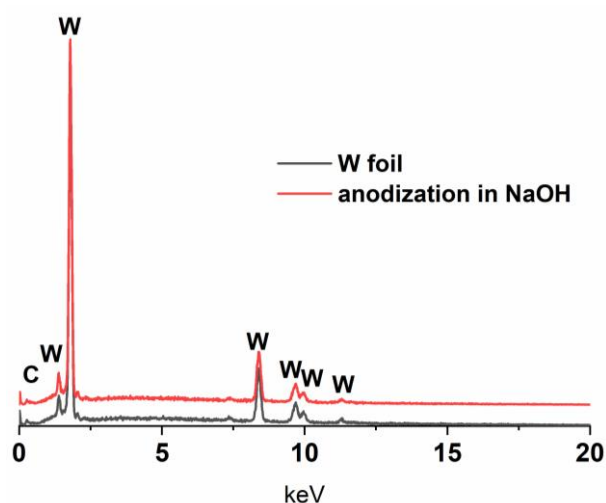

**Fig. S1.** EDS spectra of tungsten foil and tungsten sample anodized in a 1.8 M NaOH solution.

## 2. Mott-Schottky analysis

**Table. S1.** Flat band potentials estimated for all studied WO<sub>3</sub> samples at 200, 500 and 1000 Hz.

| WO <sub>3</sub> sample label | Flat band potential / V vs. SCE |        |         |
|------------------------------|---------------------------------|--------|---------|
|                              | 200 Hz                          | 500 Hz | 1000 Hz |
| <b>B</b>                     | -0.05                           | -0.03  | -0.08   |
| <b>C</b>                     | -0.10                           | -0.15  | -0.25   |
| <b>D</b>                     | -0.15                           | -0.20  | -0.25   |
| <b>G</b>                     | -0.12                           | -0.17  | -0.20   |
| <b>F</b>                     | -0.10                           | -0.18  | -0.24   |

## 3. UV-Vis reflectance measurements

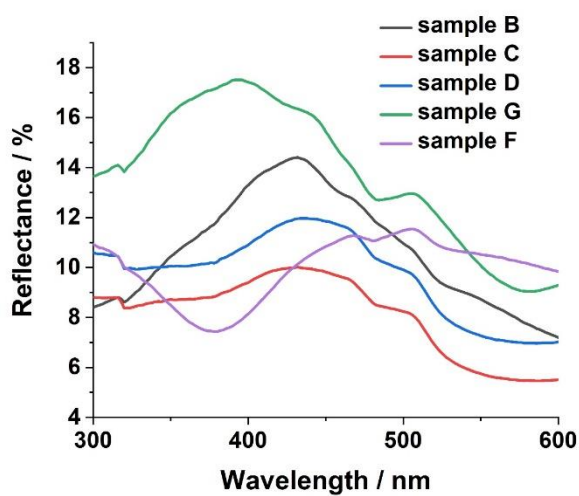

**Fig. S2.** UV-Vis reflectance spectra for all studied WO<sub>3</sub> samples after anodization and annealing in air at 500 °C for 2 h.

The optical band gaps of anodic WO<sub>3</sub> layers were also estimated from UV-Vis diffusion reflectance measurements using the Tauc method (see Fig. 8B). The method is based on the assumption that the absorption coefficient  $\alpha$  depends on energy according to the following relation (1):

$$(\alpha \cdot h\nu)^{1/\gamma} = B \cdot (h\nu - E_g) \quad (1)$$

where  $h$  – the Planck constant,  $\nu$  – frequency of photon,  $B$  – constant depending on the material disorder,  $E_g$  – the band gap energy,  $\gamma$  – constant depending on the nature of electron transition, which is equal to  $\frac{1}{2}$  for direct and 2 for indirect transition band gaps [3, 54]]. The recorded reflectance spectra were transformed to absorption spectra using the Kubelka-Munk function given by the equation (2):

$$F(R_\infty) = \frac{(1-R_\infty)^2}{2R_\infty} \quad (2)$$

where:  $R_\infty$  – reflectance,  $F(R_\infty)$  – Kubelka-Munk function [54 – 56]. Since  $F(R_\infty)$  is proportional to  $\alpha$ , in the next step  $\alpha$  in equation 3 can be substituted with  $F(R_\infty)$  [54 – 56].

#### 4. Photoelectrochemical response stability

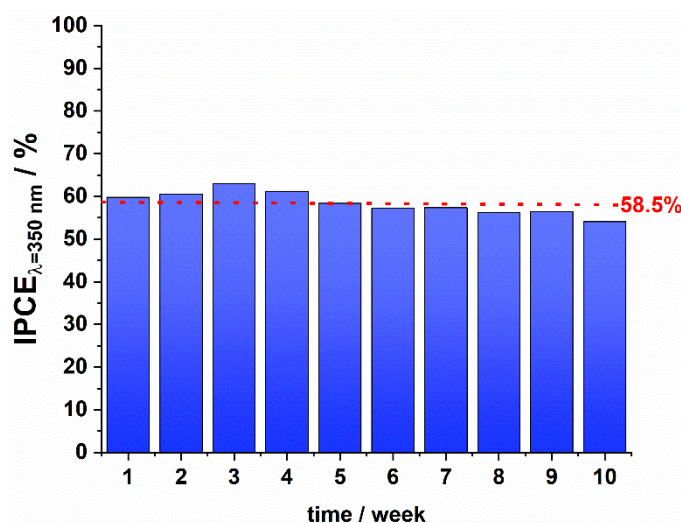

**Fig. S3.** IPCE values obtained at 1 V vs. SCE for the sample B over 10 weeks of storage with corresponding average response.
